# Supplementary material for: Mg composition dependent band offsets of Zn1−xMgxO/ZnO heterojunctions
Source: Royal Society of Chemistry journal article supplement (doi:10.1039/c3cp51156a), 2013-01-01
Supplement: c3cp51156a.pdf [file c3cp51156a.pdf]

## SUPPORTING INFORMATION

### **Mg composition dependent band offset of $\text{Zn}_{1-x}\text{Mg}_x\text{O}/\text{ZnO}$ heterojunctions**

H.H. Zhang, X.H. Pan\*, B. Lu\*, J.Y. Huang, P. Ding, W. Chen, H.P. He, J.G. Lu, S.S.  
Chen, Z.Z. Ye\*

*State Key Laboratory of Silicon Materials, Cyrus Tang Center for Sensor Materials  
and Applications, Department of Materials Science and Engineering, Zhejiang  
University, Hangzhou 310027, People's Republic of China*

\* Corresponding authors. Tel.: + 86 571 87952187; fax: + 86 571 87952124. E-mail  
addresses: panxinhua@zju.edu.cn (X.H. Pan), binlu@zju.edu.cn (B. Lu),  
yezz@zju.edu.cn (Z.Z. Ye).

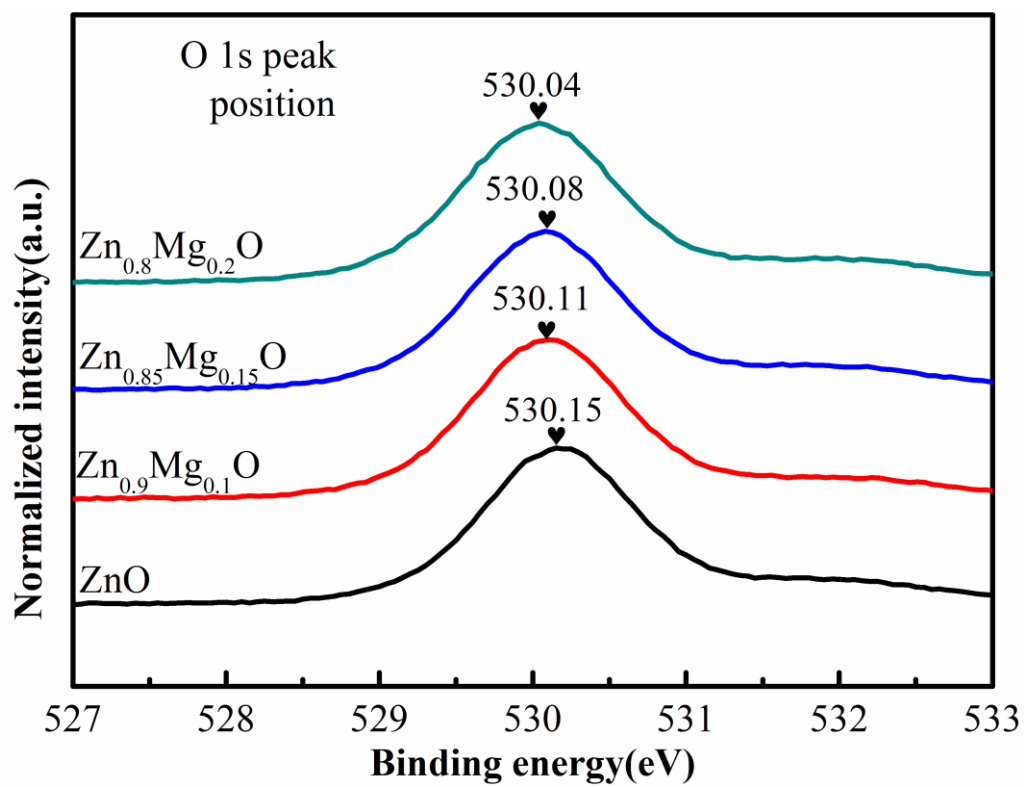

Fig. S1 O 1s peak position evolution for Zn<sub>1-x</sub>Mg<sub>x</sub>O films as a function of Mg composition.

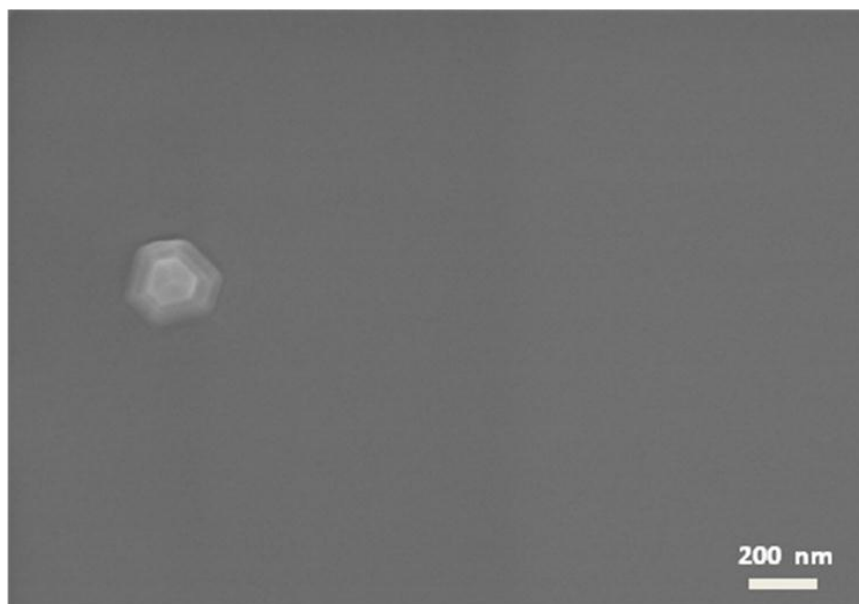

Fig. S2 SEM top image of a typical ZnO film.
